# Supplementary material for: Alginate fibers embedded with silver nanoparticles as efficient catalysts for reduction of 4-nitrophenol
Source: Royal Society of Chemistry journal article supplement (doi:10.1039/c5ra07821k), 2015-01-01
Supplement: c5ra07821k1.pdf [file c5ra07821k1.pdf]

## Supplementary Information

### **Alginate fibers embedded with silver nanoparticles as efficient catalysts for reduction of 4-nitrophenol**

Xihui Zhao <sup>a,c,\*</sup>, Qun Li <sup>a,c</sup>, Xiaomei Ma <sup>a,c</sup>, Zhong Xiong <sup>a,c</sup>, Fengyu Quan <sup>a,c</sup>, Yanzhi Xia <sup>b,c,\*</sup>

<sup>a</sup> College of chemistry and chemical engineering, Qingdao University, Qingdao 266071, China

<sup>b</sup> State Key Laboratory Cultivating Base for New Fiber Materials and Modern Textiles, Qingdao University, Qingdao 266071, China

<sup>c</sup> Collaborative Innovation Center for Marine Biomass Fibers, Materials and Textiles of Shandong Province, Qingdao University, Qingdao 266071, China

---

\* Corresponding author: Tel.: +86 532 85950962; Fax: +86 532 85952497

E-mail address: [gaozxh@163.com](mailto:gaozxh@163.com) (X. Zhao), [xiayzh@qdu.edu.cn](mailto:xiayzh@qdu.edu.cn) (Y. Xia)

**List of contents:**

Table S1 EDS quantitative elemental analysis of alginate-AgNPs fibers synthesized at 80 °C, 12mM AgNO<sub>3</sub>.

Fig. S1. XPS spectra for alginate-AgNPs fibers synthesized at 60°C (a) survey spectrum; (b) the deconvolution of Ag 3d region.

Fig. S2. Time-dependent absorption spectra of the reaction solution of 4-NP to 4-AP over varied formed alginate-AgNPs fibers catalyst.(a),(b),(c) are alginate-AgNPs fibers formed at 80 °C for 45 min with silver nitrate concentration of 8 mM, 16 mM and 24 mM respectively. (d),(e),(f) are alginate-AgNPs fibers synthesized at 60 °C,70 °C and 80 °C for 45 min with silver nitrate concentration of 12 mM, respectively.

Fig. S3. Plot of  $\ln(A_t/A_0)$  against the reaction time. (a) alginate-AgNPs fibers formed at 80 °C for 45 min with silver nitrate concentration of 8 mM (1), 16 mM (2) and 24 mM (3). (b) alginate-AgNPs fibers synthesized at 60 °C (1), 70 °C (2) and 80 °C (3) for 45 min with silver nitrate concentration of 12 mM, respectively.

Fig. S4. TEM images of the recycled fiber sample in cross sections.

**Table S1** EDS quantitative elemental analysis of alginate-AgNPs fibers synthesized at 80 °C, 12mM AgNO<sub>3</sub>.

| Element | Weight % | Atomic % |
|---------|----------|----------|
| C K     | 38.07    | 51.86    |
| O K     | 39.04    | 39.92    |
| Ca K    | 18.54    | 7.57     |
| Ag L    | 4.35     | 0.66     |
| Totals  | 100.00   |          |

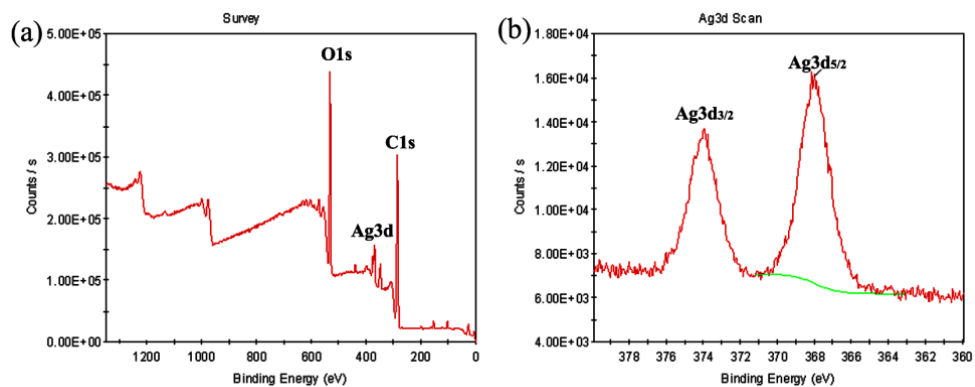

Fig. S1.

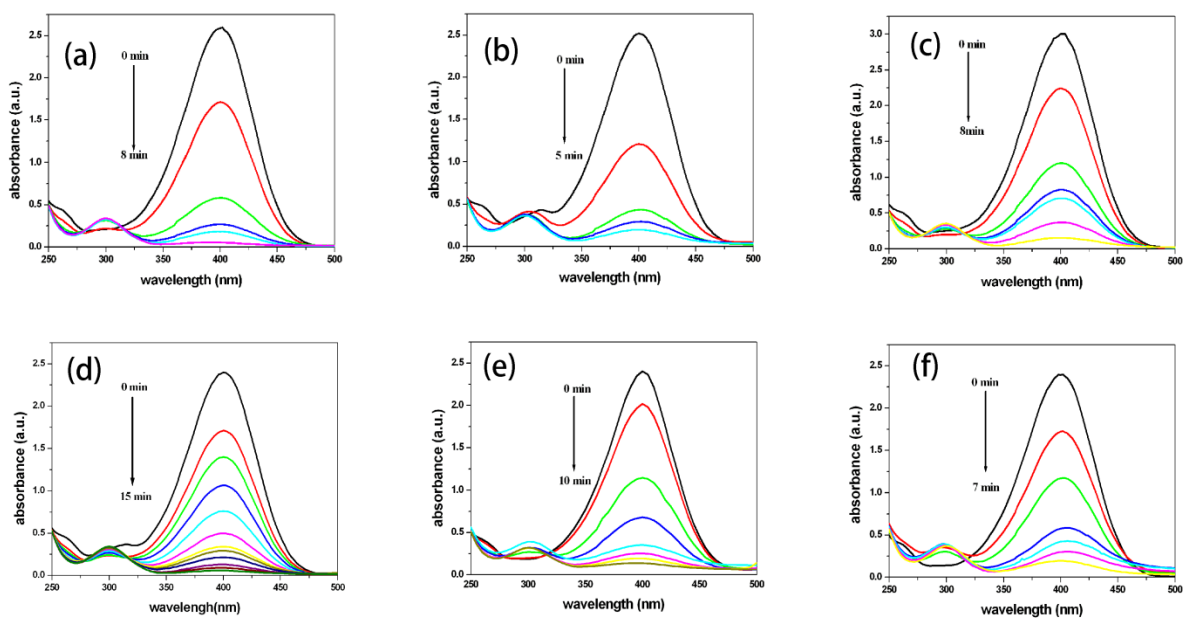

Fig. S2.

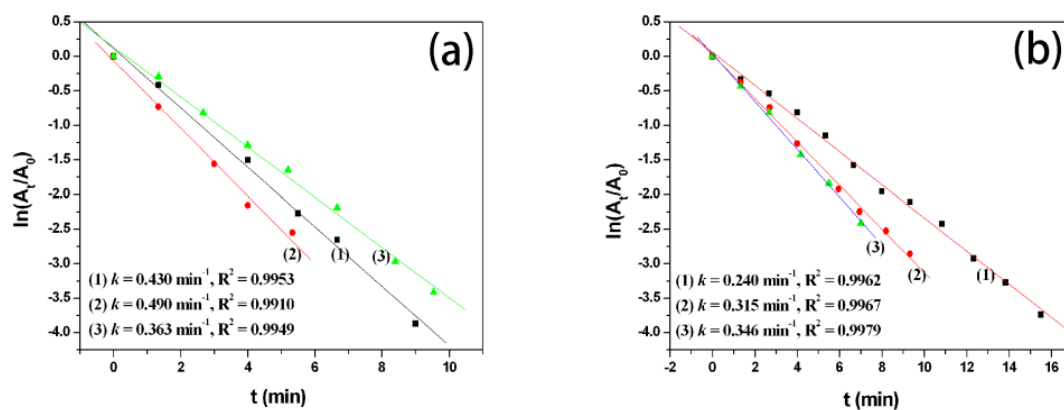

Fig. S3.

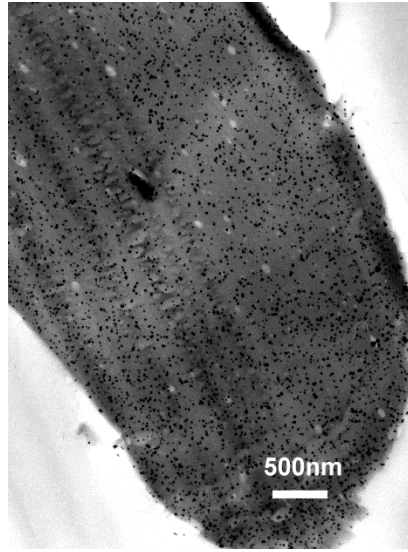

**Fig. S4.**
